# Supplementary material for: Astaxanthin attenuates oxidative stress and immune impairment in d-galactose-induced aging in rats by activating the Nrf2/Keap1 pathway and suppressing the NF-κB pathway
Source: Royal Society of Chemistry journal article supplement (doi:10.1039/d0fo01663b), 2020-01-01
Supplement: d0fo01663b1.pdf [file d0fo01663b1.pdf]

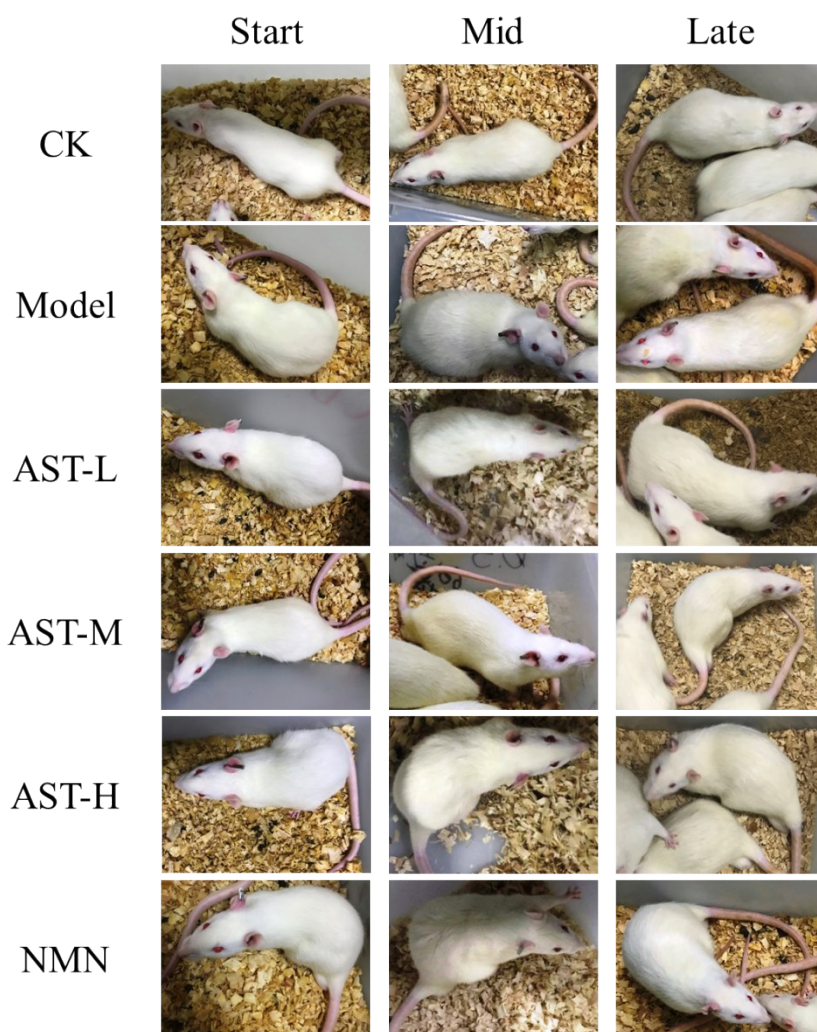

**Fig. 1.** The representative photos of changes in rats during the experiment.

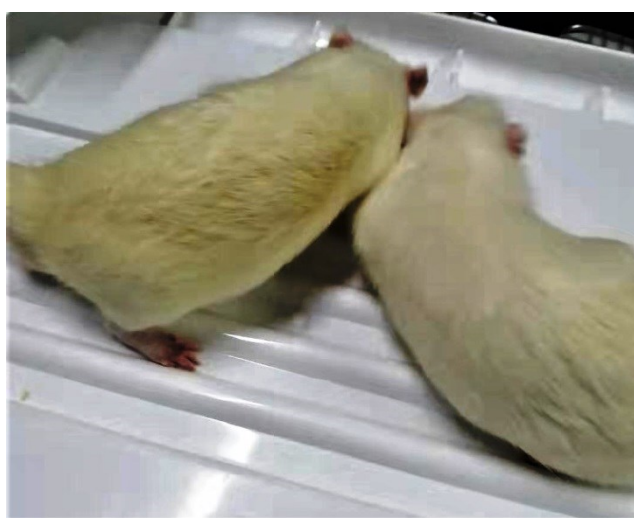

**Fig. 2.** Effect of D-galactose on appearance of rats. Left: the Model group; Right: the CK group.
